# Supplementary material for: Dynamic and Functional Characteristics of Predominant Species in Industrial Paocai as Revealed by Combined DGGE and Metagenomic Sequencing
Source: PubMed Central journal article supplement (PMC6189446; doi:10.3389/fmicb.2018.02416), 2018-10-09
Supplement: Image_1.pdf [file Image_1.pdf]

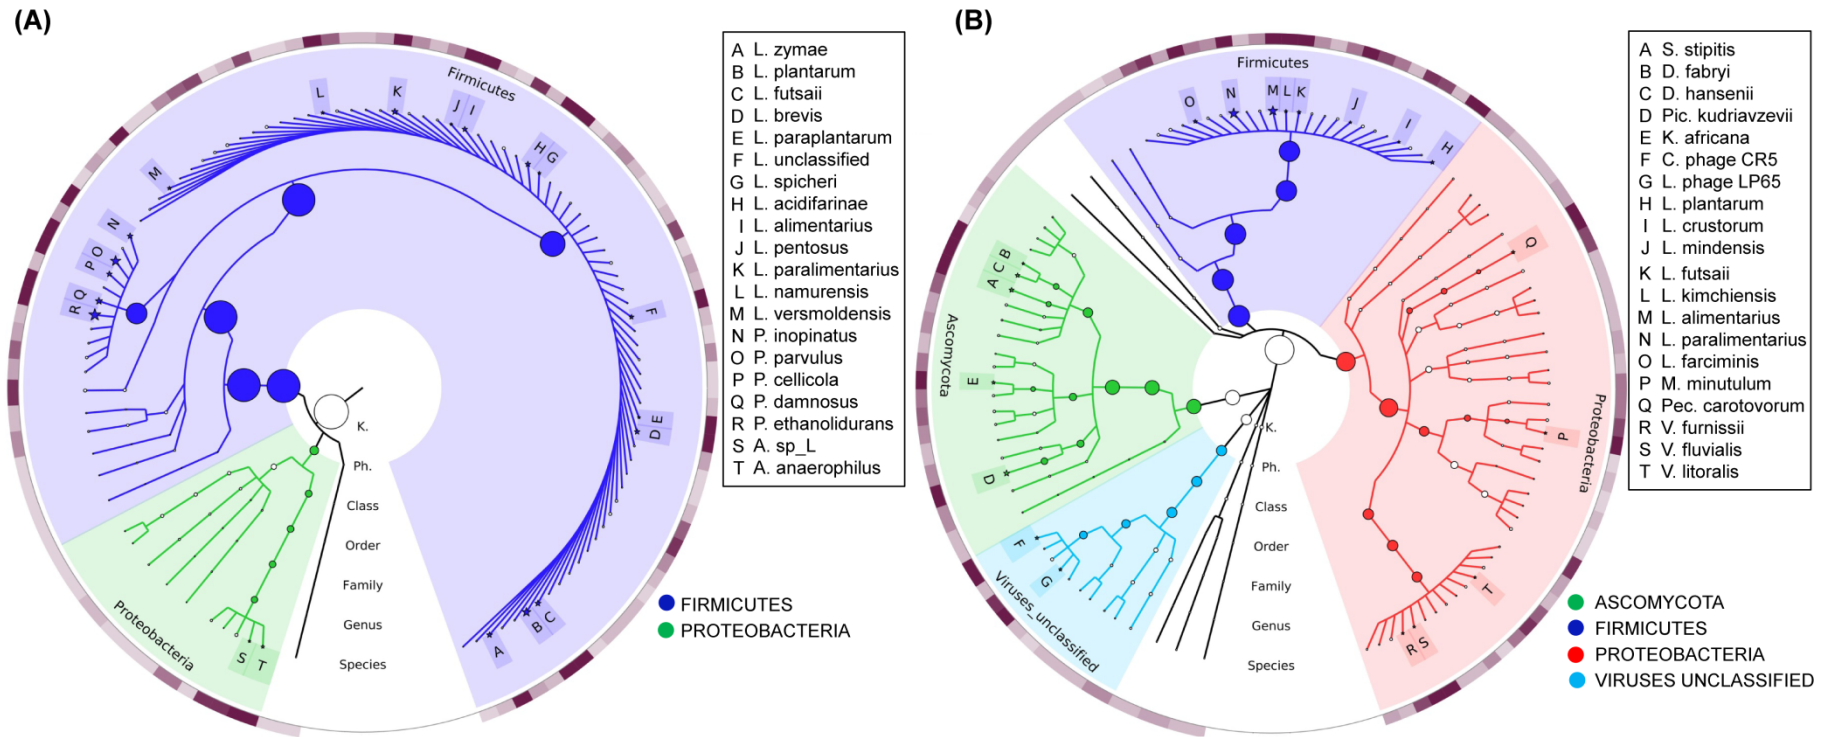

1

2 **Supplementary Figure S1** Taxonomy of the microbial community in matured industrial ZP (A) and QP (B) using metagenomic sequencing.  
 3 Only the species with abundance in top 100 was presented and the top 20 were labeled by stars. The size of star and the color thickness of the  
 4 outside ring represent the abundance of species. L.: *Lactobacillus*, P.: *Pediococcus*, A.: *Arcobacter*, S.: *Scheffersomyces*, D.: *Debaryomyces*, Pic.:  
 5 *Pichia*, K.: *Kazachstania*, C.: *Cronobacter*, M.: *Marinospirillum*, Pec.: *Pectobacterium*, V.: *Vibrio*.
